# Supplementary material
Source: MDPI journal article supplement (https://www.mdpi.com/2218-1997/6/3/45)
Supplement: s1 [file s1]

|                     ID |      z | l_disk |   mbh |   eddr |  f151 | ef151 |  l151 | el151 | loiii | eloiii |   lhb |  elhb |    rl |   erl |    pj |   jpe |
|      '0794-52376-0379' | 0.3386 |  44.83 |  7.29 |  -0.57 |  0.20 |  0.07 | 38.92 |  0.07 | 41.37 |   0.06 | 41.57 |  0.12 |  0.96 |  0.07 | 42.90 | -1.93 |
|      '0876-52669-0044' | 0.6260 |  45.36 |  7.72 |  -0.47 |  0.64 |  0.01 | 39.97 |  0.01 | 42.39 |   0.26 | 42.51 |  0.05 |  1.71 |  0.01 | 43.60 | -1.76 |
|      '0877-52353-0180' | 0.1252 |  44.30 |  6.83 |  -0.65 | -0.18 |  0.07 | 37.59 |  0.07 | 41.54 |   0.01 | 41.62 |  0.02 |  0.25 |  0.07 | 42.01 | -2.29 |
|      '0877-52353-0503' | 0.3071 |  44.97 |  7.51 |  -0.66 | -0.25 |  0.08 | 38.37 |  0.08 | 41.95 |   0.01 | 42.20 |  0.03 |  0.65 |  0.08 | 42.53 | -2.43 |
|      '0877-52353-0509' | 0.1183 |  44.34 |  7.18 |  -0.96 |  0.99 |  0.01 | 38.71 |  0.01 | 41.19 |   0.10 | 40.90 |  0.13 |  0.92 |  0.01 | 42.76 | -1.58 |
|      '0877-52353-0640' | 0.5597 |  45.56 |  7.81 |  -0.37 | -0.35 |  0.10 | 38.87 |  0.10 | 41.93 |   0.03 | 43.00 |  0.01 |  0.21 |  0.10 | 42.87 | -2.69 |
|      '0878-52353-0133' | 0.4518 |  45.06 |  6.77 |   0.18 |  1.31 |  0.00 | 40.32 |  0.00 | 41.49 |   0.04 | 41.87 |  0.04 |  2.38 |  0.00 | 43.83 | -1.22 |
|      '0878-52353-0342' | 0.4017 |  45.47 |  7.36 |  -0.01 |  0.00 |  0.05 | 38.89 |  0.05 | 41.84 |   0.10 | 42.52 |  0.01 |  0.68 |  0.05 | 42.88 | -2.59 |
|      '0879-52365-0115' | 0.2397 |  44.29 |  6.71 |  -0.54 | -0.40 |  0.13 | 37.99 |  0.13 | 41.17 |   0.03 | 41.42 |  0.07 |  0.42 |  0.13 | 42.27 | -2.01 |
|      '0879-52365-0153' | 0.2339 |  45.33 |  7.74 |  -0.53 |  0.53 |  0.02 | 38.90 |  0.02 | 42.22 |   0.01 | 42.38 |  0.00 |  0.77 |  0.02 | 42.88 | -2.44 |
|      '0880-52367-0209' | 0.3498 |  44.72 |  7.41 |  -0.81 | -0.24 |  0.08 | 38.51 |  0.08 | 41.26 |   0.02 | 41.74 |  0.06 |  0.67 |  0.08 | 42.63 | -2.09 |
|      '0880-52367-0234' | 0.6420 |  45.56 |  7.81 |  -0.36 | -0.15 |  0.08 | 39.21 |  0.08 | 42.91 |   0.02 | 42.99 |  0.02 |  0.74 |  0.08 | 43.09 | -2.47 |
|      '0880-52367-0387' | 0.4135 |  45.16 |  7.37 |  -0.33 |  0.22 |  0.04 | 39.14 |  0.04 | 41.91 |   0.03 | 42.30 |  0.03 |  1.12 |  0.04 | 43.04 | -2.11 |
|      '0881-52368-0064' | 0.1542 |  45.07 |  7.14 |  -0.18 |  0.99 |  0.01 | 38.96 |  0.01 | 41.53 |   0.21 | 41.94 |  0.01 |  1.06 |  0.01 | 42.92 | -2.14 |
|      '0881-52368-0410' | 0.7711 |  45.85 |  7.97 |  -0.24 | -0.44 |  0.12 | 39.10 |  0.12 | 42.61 |   0.18 | 43.19 |  0.03 |  0.03 |  0.12 | 43.02 | -2.83 |
|      '0881-52368-0621' | 0.1179 |  44.09 |  7.09 |  -1.12 |  0.31 |  0.02 | 38.03 |  0.02 | 40.95 |   0.01 | 40.80 |  0.04 |  0.55 |  0.02 | 42.30 | -1.79 |
|      '0882-52370-0065' | 0.3992 |  45.09 |  7.47 |  -0.49 |  0.52 |  0.03 | 39.40 |  0.03 | 41.70 |   0.02 | 42.04 |  0.03 |  1.53 |  0.03 | 43.22 | -1.87 |
|      '0884-52374-0203' | 0.2411 |  44.82 |  7.26 |  -0.55 | -0.15 |  0.07 | 38.24 |  0.07 | 41.46 |   0.04 | 41.94 |  0.02 |  0.51 |  0.07 | 42.45 | -2.37 |
|      '0886-52381-0029' | 0.4806 |  45.17 |  7.17 |  -0.12 |  0.25 |  0.02 | 39.32 |  0.02 | 41.89 |   0.05 | 42.39 |  0.02 |  1.30 |  0.02 | 43.17 | -2.00 |
|      '0886-52381-0546' | 0.2686 |  44.40 |  7.02 |  -0.74 |  0.13 |  0.05 | 38.62 |  0.05 | 41.95 |   0.02 | 41.64 |  0.04 |  0.97 |  0.05 | 42.70 | -1.70 |
|      '0887-52376-0100' | 0.0543 |  43.49 |  6.48 |  -1.11 |  0.16 |  0.03 | 37.18 |  0.03 | 40.78 |   0.03 | 40.13 |  0.03 |  0.33 |  0.03 | 41.73 | -1.75 |
|      '0887-52376-0147' | 0.7850 |  46.28 |  8.15 |   0.01 |  2.35 |  0.00 | 41.91 |  0.00 | 42.96 |   0.13 | 43.63 |  0.03 |  2.62 |  0.00 | 44.90 | -1.37 |
|      '0887-52376-0537' | 0.3392 |  44.88 |  7.25 |  -0.49 |  0.11 |  0.03 | 38.83 |  0.03 | 41.62 |   0.04 | 41.93 |  0.06 |  1.06 |  0.03 | 42.84 | -2.04 |
|      '0906-52368-0552' | 0.3320 |  45.72 |  7.89 |  -0.28 |  0.29 |  0.05 | 38.99 |  0.05 | 42.48 |   0.02 | 43.07 |  0.01 |  0.55 |  0.05 | 42.95 | -2.77 |
|      '0907-52373-0179' | 0.4653 |  45.06 |  7.51 |  -0.57 |  0.23 |  0.05 | 39.26 |  0.05 | 41.69 |   0.07 | 42.17 |  0.04 |  1.32 |  0.05 | 43.13 | -1.93 |
|      '0908-52373-0035' | 0.3427 |  45.05 |  7.36 |  -0.43 |  0.00 |  0.06 | 38.73 |  0.06 | 41.28 |   0.23 | 41.70 |  0.12 |  0.87 |  0.06 | 42.77 | -2.27 |
|      '0909-52379-0011' | 0.5049 |  45.18 |  7.61 |  -0.55 | -0.01 |  0.07 | 39.10 |  0.07 | 42.02 |   0.04 | 42.74 |  0.02 |  0.85 |  0.07 | 43.02 | -2.15 |
|      '0964-52646-0580' | 0.4060 |  44.91 |  6.89 |  -0.10 |  0.35 |  0.02 | 39.25 |  0.02 | 41.65 |   0.03 | 41.83 |  0.04 |  1.46 |  0.02 | 43.12 | -1.78 |
|      '0964-52646-0612' | 0.2318 |  44.81 |  7.41 |  -0.72 |  0.77 |  0.01 | 39.13 |  0.01 | 42.33 |   0.01 | 41.82 |  0.05 |  1.14 |  0.01 | 43.04 | -1.77 |
|      '0965-52438-0307' | 0.5981 |  45.64 |  7.85 |  -0.33 | -0.14 |  0.08 | 39.15 |  0.08 | 41.97 |   0.07 | 42.87 |  0.02 |  0.60 |  0.08 | 43.05 | -2.59 |
|      '0966-52642-0373' | 0.2074 |  44.52 |  7.31 |  -0.90 |  0.09 |  0.06 | 38.33 |  0.06 | 41.62 |   0.03 | 41.51 |  0.03 |  1.04 |  0.06 | 42.51 | -2.01 |
|      '0966-52642-0625' | 0.2545 |  44.58 |  6.97 |  -0.51 | -0.22 |  0.10 | 38.22 |  0.10 | 40.86 |   0.08 | 41.26 |  0.03 |  0.71 |  0.10 | 42.43 | -2.15 |
|      '0967-52636-0040' | 0.4342 |  44.99 |  6.65 |   0.22 | -0.10 |  0.06 | 38.87 |  0.06 | 41.70 |   0.05 | 42.16 |  0.02 |  0.77 |  0.06 | 42.86 | -2.12 |
|      '0967-52636-0214' | 0.3040 |  44.75 |  7.47 |  -0.84 |  0.18 |  0.03 | 38.79 |  0.03 | 41.85 |   0.03 | 41.93 |  0.03 |  1.03 |  0.03 | 42.81 | -1.93 |
|      '0969-52442-0169' | 0.2157 |  44.27 |  7.23 |  -1.08 |  0.18 |  0.03 | 38.47 |  0.03 | 41.75 |   0.01 | 41.41 |  0.06 |  0.64 |  0.03 | 42.60 | -1.67 |
|      '0969-52442-0505' | 0.1720 |  44.35 |  7.16 |  -0.93 |  0.29 |  0.03 | 38.36 |  0.03 | 41.50 |   0.03 | 41.20 |  0.02 |  0.93 |  0.03 | 42.53 | -1.82 |
|      '0970-52413-0347' | 0.0621 |  43.98 |  6.99 |  -1.13 |  0.49 |  0.02 | 37.62 |  0.02 | 40.94 |   0.02 | 40.74 |  0.04 |  0.17 |  0.02 | 42.03 | -1.95 |
|      '0971-52644-0036' | 0.2621 |  45.41 |  7.51 |  -0.21 | -0.53 |  0.13 | 37.95 |  0.13 | 41.64 |   0.04 | 42.60 |  0.01 | -0.08 |  0.13 | 42.25 | -3.16 |
|      '0971-52644-0520' | 0.2628 |  45.04 |  6.89 |   0.04 |  0.36 |  0.02 | 38.84 |  0.02 | 41.79 |   0.02 | 41.74 |  0.05 |  0.94 |  0.02 | 42.84 | -2.19 |
|      '1010-52649-0220' | 0.2841 |  45.73 |  7.84 |  -0.23 |  0.19 |  0.05 | 38.74 |  0.05 | 42.10 |   0.02 | 42.97 |  0.01 |  0.29 |  0.05 | 42.78 | -2.95 |
|      '1010-52649-0470' | 0.5021 |  45.81 |  7.99 |  -0.30 |  0.37 |  0.03 | 39.48 |  0.03 | 42.04 |   0.05 | 42.83 |  0.02 |  0.81 |  0.03 | 43.27 | -2.53 |
|      '1010-52649-0627' | 0.2635 |  44.70 |  7.27 |  -0.69 |  0.06 |  0.05 | 38.53 |  0.05 | 41.23 |   0.05 | 41.46 |  0.03 |  0.96 |  0.05 | 42.64 | -2.06 |
|      '1012-52649-0074' | 0.1028 |  45.02 |  7.55 |  -0.64 |  1.06 |  0.01 | 38.65 |  0.01 | 42.02 |   0.01 | 42.43 |  0.01 |  0.90 |  0.01 | 42.72 | -2.30 |
|      '1012-52649-0133' | 0.0791 |  43.98 |  6.69 |  -0.82 | -0.16 |  0.08 | 37.19 |  0.08 | 40.61 |   0.03 | 40.56 |  0.02 | -0.19 |  0.08 | 41.74 | -2.24 |
|      '1013-52707-0611' | 0.1751 |  44.17 |  7.19 |  -1.14 | -0.02 |  0.04 | 38.06 |  0.04 | 41.01 |   0.06 | 41.20 |  0.11 |  0.41 |  0.04 | 42.33 | -1.84 |
|      '1014-52707-0443' | 0.7594 |  45.48 |  7.45 |  -0.08 | -0.15 |  0.07 | 39.37 |  0.07 | 42.00 |   0.08 | 42.63 |  0.05 |  0.93 |  0.07 | 43.20 | -2.28 |
|      '1016-52759-0074' | 0.4406 |  45.50 |  7.81 |  -0.42 |  0.67 |  0.01 | 39.65 |  0.01 | 42.45 |   0.04 | 43.09 |  0.01 |  0.99 |  0.01 | 43.39 | -2.11 |
|      '1018-52672-0023' | 0.1501 |  45.11 |  7.41 |  -0.42 |  0.69 |  0.01 | 38.64 |  0.01 | 41.78 |   0.02 | 42.04 |  0.03 |  0.71 |  0.01 | 42.71 | -2.40 |
|      '1018-52672-0070' | 0.1176 |  44.14 |  6.41 |  -0.38 |  0.60 |  0.01 | 38.32 |  0.01 | 40.63 |   0.03 | 40.67 |  0.03 |  0.61 |  0.01 | 42.50 | -1.64 |
|      '1020-52721-0232' | 0.2769 |  44.62 |  7.34 |  -0.84 | -0.04 |  0.05 | 38.48 |  0.05 | 41.28 |   0.06 | 41.72 |  0.05 |  0.92 |  0.05 | 42.61 | -2.01 |
|      '1020-52721-0415' | 0.2655 |  44.76 |  7.42 |  -0.78 | -0.21 |  0.10 | 38.28 |  0.10 | 41.76 |   0.03 | 42.01 |  0.03 |  0.70 |  0.10 | 42.47 | -2.29 |
|      '1038-52673-0037' | 0.1114 |  43.99 |  7.06 |  -1.18 |  0.23 |  0.03 | 37.90 |  0.03 | 40.95 |   0.04 | 40.67 |  0.08 |  0.38 |  0.03 | 42.22 | -1.77 |
|      '1038-52673-0096' | 0.4813 |  45.06 |  7.56 |  -0.62 | -0.38 |  0.11 | 38.69 |  0.11 | 41.78 |   0.03 | 42.67 |  0.01 |  0.47 |  0.11 | 42.74 | -2.31 |
|      '1038-52673-0443' | 0.1683 |  44.78 |  7.04 |  -0.37 |  0.36 |  0.02 | 38.41 |  0.02 | 41.25 |   0.11 | 41.81 |  0.03 |  0.79 |  0.02 | 42.56 | -2.22 |
|      '1038-52673-0564' | 0.4227 |  45.36 |  7.57 |  -0.32 | -0.08 |  0.10 | 38.86 |  0.10 | 41.96 |   0.04 | 42.74 |  0.01 |  0.70 |  0.10 | 42.86 | -2.50 |
|      '1041-52724-0314' | 0.4180 |  44.89 |  7.38 |  -0.60 | -0.25 |  0.08 | 38.68 |  0.08 | 41.56 |   0.06 | 42.19 |  0.03 |  0.75 |  0.08 | 42.74 | -2.15 |
|      '1041-52724-0476' | 0.4439 |  45.19 |  7.26 |  -0.19 | -0.02 |  0.05 | 38.97 |  0.05 | 42.06 |   0.02 | 42.38 |  0.02 |  0.92 |  0.05 | 42.93 | -2.25 |
|      '1042-52725-0132' | 0.2690 |  45.08 |  7.33 |  -0.37 | -0.28 |  0.08 | 38.22 |  0.08 | 41.69 |   0.06 | 42.30 |  0.02 |  0.23 |  0.08 | 42.43 | -2.65 |
|      '1042-52725-0580' | 0.1894 |  44.42 |  6.46 |  -0.16 |  0.09 |  0.05 | 38.25 |  0.05 | 40.87 |   0.09 | 41.34 |  0.13 |  0.33 |  0.05 | 42.45 | -1.97 |
|      '1044-52468-0091' | 0.1065 |  44.37 |  7.23 |  -0.98 |  0.17 |  0.06 | 37.80 |  0.06 | 40.92 |   0.02 | 41.29 |  0.04 |  0.51 |  0.06 | 42.15 | -2.22 |
|      '1044-52468-0369' | 0.3886 |  44.80 |  7.33 |  -0.65 | -0.25 |  0.14 | 38.61 |  0.14 | 41.39 |   0.07 | 41.82 |  0.07 |  0.79 |  0.14 | 42.69 | -2.11 |
|      '1046-52460-0480' | 0.3356 |  44.82 |  7.52 |  -0.82 |  0.12 |  0.06 | 38.83 |  0.06 | 41.56 |   0.20 | 41.92 |  0.06 |  1.05 |  0.06 | 42.84 | -1.98 |
|      '1159-52669-0295' | 0.2508 |  44.59 |  7.34 |  -0.86 |  0.02 |  0.13 | 38.45 |  0.13 | 41.62 |   0.06 | 41.70 |  0.06 |  0.82 |  0.13 | 42.59 | -2.00 |
|      '1161-52703-0389' | 0.5486 |  45.47 |  7.43 |  -0.08 |  0.52 |  0.02 | 39.71 |  0.02 | 42.41 |   0.07 | 42.76 |  0.02 |  1.27 |  0.02 | 43.43 | -2.04 |
|      '1162-52668-0141' | 0.2521 |  44.95 |  7.52 |  -0.68 | -0.13 |  0.07 | 38.31 |  0.07 | 41.85 |   0.02 | 42.22 |  0.02 |  0.54 |  0.07 | 42.49 | -2.46 |
|      '1162-52668-0156' | 0.0934 |  43.93 |  5.63 |   0.18 | -0.13 |  0.07 | 37.38 |  0.07 | 40.92 |   0.02 | 40.93 |  0.02 |  0.14 |  0.07 | 41.87 | -2.06 |
|      '1162-52668-0585' | 0.1636 |  44.43 |  7.21 |  -0.89 |  0.28 |  0.03 | 38.30 |  0.03 | 41.20 |   0.04 | 41.33 |  0.07 |  0.93 |  0.03 | 42.49 | -1.94 |
|      '1163-52669-0064' | 0.2658 |  44.48 |  7.27 |  -0.91 |  0.35 |  0.03 | 38.83 |  0.03 | 41.36 |   0.02 | 41.66 |  0.07 |  0.88 |  0.03 | 42.84 | -1.64 |
|      '1163-52669-0265' | 0.4301 |  45.02 |  7.58 |  -0.67 |  0.01 |  0.05 | 38.97 |  0.05 | 41.91 |   0.01 | 42.43 |  0.03 |  0.88 |  0.05 | 42.93 | -2.08 |
|      '1163-52669-0392' | 0.1551 |  44.37 |  7.09 |  -0.83 | -0.05 |  0.05 | 37.92 |  0.05 | 40.87 |   0.08 | 41.40 |  0.05 |  0.20 |  0.05 | 42.23 | -2.14 |
|      '1164-52674-0306' | 0.2065 |  44.62 |  6.89 |  -0.39 |  0.59 |  0.01 | 38.84 |  0.01 | 41.42 |   0.07 | 41.73 |  0.06 |  0.96 |  0.01 | 42.84 | -1.77 |
|      '1164-52674-0398' | 0.2746 |  44.41 |  7.30 |  -1.01 | -0.01 |  0.06 | 38.50 |  0.06 | 41.81 |   0.02 | 42.06 |  0.03 |  0.91 |  0.06 | 42.62 | -1.79 |
|      '1164-52674-0488' | 0.3624 |  45.48 |  7.73 |  -0.37 | -0.13 |  0.09 | 38.65 |  0.09 | 42.44 |   0.01 | 42.77 |  0.01 |  0.47 |  0.09 | 42.72 | -2.76 |
|      '1165-52703-0202' | 0.2205 |  44.83 |  7.46 |  -0.75 |  0.79 |  0.01 | 39.09 |  0.01 | 40.78 |   0.09 | 41.81 |  0.03 |  1.36 |  0.01 | 43.02 | -1.81 |
|      '1165-52703-0424' | 0.0746 |  43.95 |  6.35 |  -0.52 |  0.14 |  0.07 | 37.44 |  0.07 | 40.91 |   0.03 | 41.07 |  0.02 |  0.16 |  0.07 | 41.91 | -2.04 |
|      '1279-52736-0321' | 0.1297 |  44.39 |  7.03 |  -0.76 | -0.17 |  0.06 | 37.64 |  0.06 | 41.03 |   0.01 | 41.58 |  0.02 |  0.29 |  0.06 | 42.04 | -2.34 |
|      '1280-52738-0344' | 0.6521 |  45.45 |  7.76 |  -0.43 | -0.04 |  0.05 | 39.33 |  0.05 | 42.99 |   0.01 | 42.83 |  0.04 |  0.92 |  0.05 | 43.17 | -2.27 |
|      '1280-52738-0601' | 0.0551 |  43.93 |  6.93 |  -1.12 | -0.39 |  0.11 | 36.64 |  0.11 | 40.86 |   0.01 | 41.20 |  0.01 | -0.08 |  0.11 | 41.37 | -2.55 |
|      '1281-52753-0504' | 0.5734 |  45.36 |  7.69 |  -0.45 | -0.53 |  0.13 | 38.71 |  0.13 | 41.38 |   0.12 | 42.41 |  0.08 |  0.56 |  0.13 | 42.76 | -2.60 |
|      '1283-52762-0113' | 0.0277 |  43.70 |  5.64 |  -0.06 |  2.74 |  0.00 | 39.16 |  0.00 | 41.03 |   0.01 | 40.24 |  0.03 |  1.70 |  0.00 | 43.06 | -0.64 |
|      '1283-52762-0250' | 0.1853 |  44.52 |  7.24 |  -0.84 |  0.15 |  0.03 | 38.29 |  0.03 | 41.45 |   0.03 | 41.53 |  0.05 |  0.86 |  0.03 | 42.48 | -2.04 |
|      '1283-52762-0430' | 0.1214 |  44.51 |  7.26 |  -0.87 |  0.51 |  0.01 | 38.25 |  0.01 | 41.98 |   0.01 | 42.04 |  0.01 |  0.89 |  0.01 | 42.45 | -2.05 |
|      '1283-52762-0435' | 0.2820 |  44.70 |  6.89 |  -0.31 | -0.21 |  0.05 | 38.33 |  0.05 | 40.94 |   0.04 | 41.49 |  0.08 |  0.44 |  0.05 | 42.50 | -2.19 |
|      '1283-52762-0508' | 0.1951 |  44.15 |  7.18 |  -1.15 | -0.11 |  0.05 | 38.08 |  0.05 | 40.94 |   0.02 | 41.04 |  0.05 |  0.77 |  0.05 | 42.34 | -1.81 |
|      '1283-52762-0635' | 0.0911 |  44.26 |  6.97 |  -0.83 | -0.07 |  0.05 | 37.41 |  0.05 | 40.75 |   0.03 | 40.95 |  0.02 |  0.18 |  0.05 | 41.89 | -2.37 |
|      '1284-52736-0230' | 0.2671 |  45.09 |  7.60 |  -0.63 |  0.05 |  0.04 | 38.54 |  0.04 | 41.02 |   0.03 | 42.02 |  0.01 |  0.56 |  0.04 | 42.65 | -2.44 |
|      '1285-52723-0046' | 0.2668 |  44.59 |  6.48 |  -0.01 | -0.06 |  0.05 | 38.43 |  0.05 | 41.09 |   0.11 | 41.46 |  0.12 |  0.67 |  0.05 | 42.57 | -2.02 |
|      '1285-52723-0146' | 0.5950 |  45.39 |  7.31 |  -0.03 |  0.46 |  0.01 | 39.74 |  0.01 | 42.07 |   0.11 | 42.48 |  0.04 |  1.46 |  0.01 | 43.45 | -1.94 |
|      '1286-52725-0296' | 0.5078 |  45.48 |  7.69 |  -0.33 |  0.35 |  0.02 | 39.47 |  0.02 | 42.36 |   0.02 | 42.85 |  0.01 |  1.12 |  0.02 | 43.27 | -2.21 |
|      '1286-52725-0487' | 0.3343 |  45.42 |  7.32 |  -0.01 |  0.10 |  0.03 | 38.81 |  0.03 | 41.73 |   0.07 | 42.52 |  0.01 |  0.63 |  0.03 | 42.82 | -2.59 |
|      '1286-52725-0598' | 0.1496 |  44.73 |  7.36 |  -0.75 | -0.46 |  0.13 | 37.48 |  0.13 | 41.37 |   0.03 | 42.07 |  0.01 | -0.03 |  0.13 | 41.93 | -2.79 |
|      '1287-52728-0402' | 0.0704 |  44.17 |  7.18 |  -1.13 |  0.62 |  0.01 | 37.87 |  0.01 | 41.10 |   0.01 | 41.14 |  0.04 |  0.24 |  0.01 | 42.20 | -1.97 |
|      '1288-52731-0418' | 0.0935 |  44.11 |  6.46 |  -0.47 | -0.24 |  0.12 | 37.27 |  0.12 | 41.61 |   0.01 | 41.11 |  0.03 |  0.30 |  0.12 | 41.79 | -2.32 |
|      '1309-52762-0069' | 0.2281 |  44.41 |  6.78 |  -0.49 | -0.17 |  0.10 | 38.17 |  0.10 | 41.24 |   0.04 | 41.51 |  0.07 |  0.76 |  0.10 | 42.40 | -2.01 |
|      '1310-53033-0210' | 0.1594 |  44.03 |  7.06 |  -1.15 | -0.30 |  0.10 | 37.70 |  0.10 | 40.92 |   0.01 | 40.85 |  0.05 |  0.12 |  0.10 | 42.08 | -1.95 |
|      '1310-53033-0283' | 0.0488 |  43.13 |  6.38 |  -1.37 | -0.21 |  0.07 | 36.71 |  0.07 | 40.53 |   0.01 | 40.08 |  0.02 | -0.47 |  0.07 | 41.42 | -1.71 |
|      '1312-52781-0121' | 0.0508 |  43.64 |  6.51 |  -0.99 | -0.25 |  0.12 | 36.71 |  0.12 | 40.73 |   0.00 | 40.27 |  0.02 | -0.24 |  0.12 | 41.42 | -2.22 |
|      '1319-52791-0004' | 0.3334 |  44.95 |  7.43 |  -0.60 | -0.14 |  0.06 | 38.57 |  0.06 | 41.21 |   0.09 | 42.05 |  0.04 |  0.63 |  0.06 | 42.66 | -2.28 |
|      '1319-52791-0034' | 0.6212 |  45.72 |  7.60 |   0.00 |  1.09 |  0.01 | 40.42 |  0.01 | 42.41 |   0.03 | 42.75 |  0.03 |  2.04 |  0.01 | 43.90 | -1.82 |
|      '1322-52791-0494' | 0.3764 |  44.83 |  6.91 |  -0.20 | -0.15 |  0.08 | 38.67 |  0.08 | 41.01 |   0.10 | 42.00 |  0.03 |  0.81 |  0.08 | 42.73 | -2.10 |
|      '1323-52797-0236' | 0.5615 |  45.22 |  7.69 |  -0.59 | -0.24 |  0.08 | 38.98 |  0.08 | 42.04 |   0.04 | 42.84 |  0.03 |  0.68 |  0.08 | 42.94 | -2.28 |
|      '1323-52797-0443' | 0.1215 |  45.01 |  7.59 |  -0.69 |  1.30 |  0.00 | 39.04 |  0.00 | 42.29 |   0.01 | 42.02 |  0.01 |  1.35 |  0.00 | 42.98 | -2.02 |
|      '1324-53088-0142' | 0.2908 |  45.21 |  7.53 |  -0.43 |  0.88 |  0.01 | 39.45 |  0.01 | 41.40 |   0.04 | 42.23 |  0.03 |  1.43 |  0.01 | 43.26 | -1.95 |
|      '1324-53088-0501' | 0.1399 |  44.19 |  7.11 |  -1.04 |  0.16 |  0.03 | 38.03 |  0.03 | 41.16 |   0.05 | 41.25 |  0.04 |  0.46 |  0.03 | 42.31 | -1.88 |
|      '1324-53088-0520' | 0.2246 |  44.64 |  7.27 |  -0.74 |  0.22 |  0.04 | 38.54 |  0.04 | 42.27 |   0.00 | 41.93 |  0.02 |  0.94 |  0.04 | 42.65 | -1.99 |
|      '1326-52764-0324' | 0.5834 |  45.52 |  7.11 |   0.29 |  0.17 |  0.04 | 39.43 |  0.04 | 42.80 |   0.03 | 42.60 |  0.02 |  1.29 |  0.04 | 43.24 | -2.27 |
|      '1327-52781-0414' | 0.4417 |  45.07 |  7.57 |  -0.62 | -0.26 |  0.11 | 38.72 |  0.11 | 41.77 |   0.04 | 41.93 |  0.08 |  0.69 |  0.11 | 42.77 | -2.30 |
|      '1328-52786-0030' | 0.1320 |  44.05 |  6.76 |  -0.82 |  0.40 |  0.02 | 38.22 |  0.02 | 40.75 |   0.06 | 41.21 |  0.05 |  0.39 |  0.02 | 42.43 | -1.62 |
|      '1328-52786-0033' | 0.1311 |  43.83 |  6.92 |  -1.21 | -0.16 |  0.10 | 37.66 |  0.10 | 41.60 |   0.03 | 41.50 |  0.03 |  0.75 |  0.10 | 42.05 | -1.77 |
|      '1328-52786-0195' | 0.3055 |  45.04 |  7.33 |  -0.41 |  0.12 |  0.04 | 38.74 |  0.04 | 41.70 |   0.06 | 42.38 |  0.02 |  0.88 |  0.04 | 42.78 | -2.26 |
|      '1328-52786-0215' | 0.6079 |  45.35 |  7.66 |  -0.42 |  0.08 |  0.05 | 39.38 |  0.05 | 42.24 |   0.02 | 42.66 |  0.03 |  1.13 |  0.05 | 43.21 | -2.14 |
|      '1328-52786-0238' | 0.5302 |  45.07 |  7.34 |  -0.39 |  0.53 |  0.02 | 39.69 |  0.02 | 41.73 |   0.08 | 42.24 |  0.04 |  1.60 |  0.02 | 43.42 | -1.65 |
|      '1329-52767-0520' | 0.1724 |  44.37 |  7.07 |  -0.82 | -0.23 |  0.10 | 37.84 |  0.10 | 41.20 |   0.05 | 41.59 |  0.04 |  0.26 |  0.10 | 42.18 | -2.19 |
|      '1371-52821-0404' | 0.2450 |  44.69 |  7.42 |  -0.84 |  0.14 |  0.05 | 38.55 |  0.05 | 41.40 |   0.03 | 41.84 |  0.04 |  0.63 |  0.05 | 42.65 | -2.04 |
|      '1436-53054-0495' | 0.0314 |  43.08 |  6.31 |  -1.34 |  0.11 |  0.05 | 36.64 |  0.05 | 40.56 |   0.01 | 40.10 |  0.01 | -0.04 |  0.05 | 41.37 | -1.71 |
|      '1441-53083-0595' | 0.2839 |  44.55 |  7.33 |  -0.90 | -0.47 |  0.13 | 38.08 |  0.13 | 41.34 |   0.02 | 41.54 |  0.08 |  0.44 |  0.13 | 42.33 | -2.21 |
|      '1444-53054-0009' | 0.1503 |  44.33 |  7.21 |  -1.00 |  0.22 |  0.04 | 38.16 |  0.04 | 41.60 |   0.02 | 41.52 |  0.01 |  0.56 |  0.04 | 42.39 | -1.94 |
|      '1444-53054-0385' | 0.0925 |  43.68 |  6.71 |  -1.15 |  0.07 |  0.04 | 37.56 |  0.04 | 41.19 |   0.01 | 40.72 |  0.09 |  0.59 |  0.04 | 41.99 | -1.69 |
|      '1451-53117-0268' | 0.4964 |  45.79 |  7.92 |  -0.25 |  0.97 |  0.01 | 40.07 |  0.01 | 42.41 |   0.02 | 43.02 |  0.01 |  1.48 |  0.01 | 43.67 | -2.12 |
|      '1453-53084-0222' | 0.6617 |  45.41 |  7.43 |  -0.14 |  0.19 |  0.03 | 39.58 |  0.03 | 42.01 |   0.07 | 42.54 |  0.04 |  1.10 |  0.03 | 43.34 | -2.07 |
|      '1461-53062-0025' | 0.1393 |  44.60 |  7.29 |  -0.81 |  0.73 |  0.01 | 38.61 |  0.01 | 41.20 |   0.03 | 41.63 |  0.03 |  0.76 |  0.01 | 42.69 | -1.91 |
|      '1461-53062-0199' | 0.0983 |  44.02 |  7.10 |  -1.20 | -0.34 |  0.14 | 37.21 |  0.14 | 41.00 |   0.03 | 41.17 |  0.01 |  0.03 |  0.14 | 41.75 | -2.26 |
|      '1461-53062-0512' | 0.2159 |  44.60 |  7.11 |  -0.63 | -0.14 |  0.07 | 38.15 |  0.07 | 41.74 |   0.02 | 41.71 |  0.04 |  0.57 |  0.07 | 42.38 | -2.21 |
|      '1465-53082-0534' | 0.0864 |  44.38 |  7.19 |  -0.92 |  0.57 |  0.02 | 38.00 |  0.02 | 41.20 |   0.02 | 41.35 |  0.01 |  0.73 |  0.02 | 42.28 | -2.09 |
|      '1667-53430-0044' | 0.2548 |  44.68 |  7.12 |  -0.56 | -0.32 |  0.08 | 38.12 |  0.08 | 40.92 |   0.06 | 41.49 |  0.05 |  0.56 |  0.08 | 42.36 | -2.31 |
|      '1667-53430-0061' | 0.1388 |  44.07 |  7.07 |  -1.12 | -0.06 |  0.05 | 37.81 |  0.05 | 41.03 |   0.01 | 40.79 |  0.03 |  0.94 |  0.05 | 42.16 | -1.91 |
|      '1667-53430-0084' | 0.2330 |  45.17 |  7.42 |  -0.37 |  1.16 |  0.00 | 39.51 |  0.00 | 41.85 |   0.03 | 41.95 |  0.04 |  1.52 |  0.00 | 43.30 | -1.87 |
|      '1667-53430-0222' | 0.6078 |  45.84 |  7.69 |   0.04 | -0.06 |  0.04 | 39.24 |  0.04 | 42.20 |   0.12 | 43.08 |  0.01 |  0.50 |  0.04 | 43.11 | -2.72 |
|      '1667-53430-0489' | 0.2718 |  44.70 |  7.37 |  -0.79 | -0.14 |  0.06 | 38.37 |  0.06 | 41.26 |   0.03 | 41.64 |  0.06 |  0.59 |  0.06 | 42.53 | -2.17 |
|      '1667-53430-0495' | 0.4885 |  45.12 |  7.64 |  -0.64 | -0.06 |  0.06 | 39.02 |  0.06 | 41.93 |   0.05 | 42.77 |  0.02 |  0.70 |  0.06 | 42.97 | -2.15 |
|      '1667-53430-0537' | 0.0919 |  44.35 |  6.52 |  -0.29 |  0.61 |  0.01 | 38.10 |  0.01 | 41.31 |   0.01 | 41.33 |  0.02 |  1.01 |  0.01 | 42.35 | -1.99 |
|      '1668-53433-0507' | 0.3251 |  45.22 |  7.70 |  -0.59 | -0.45 |  0.14 | 38.23 |  0.14 | 41.80 |   0.07 | 42.50 |  0.02 |  0.16 |  0.14 | 42.44 | -2.78 |
|      '1669-53433-0063' | 0.2932 |  45.31 |  7.41 |  -0.22 |  0.19 |  0.03 | 38.77 |  0.03 | 42.05 |   0.07 | 42.43 |  0.01 |  0.65 |  0.03 | 42.80 | -2.51 |
|      '1669-53433-0240' | 0.2349 |  44.81 |  7.50 |  -0.81 |  0.48 |  0.02 | 38.85 |  0.02 | 41.72 |   0.04 | 41.82 |  0.04 |  0.98 |  0.02 | 42.85 | -1.96 |
|      '1669-53433-0504' | 0.4121 |  45.08 |  7.64 |  -0.68 | -0.27 |  0.08 | 38.65 |  0.08 | 41.43 |   0.10 | 42.24 |  0.04 |  0.61 |  0.08 | 42.72 | -2.36 |
|      '1671-53446-0521' | 0.4126 |  45.23 |  7.53 |  -0.42 |  0.16 |  0.09 | 39.08 |  0.09 | 41.93 |   0.06 | 42.45 |  0.03 |  0.92 |  0.09 | 43.00 | -2.22 |
|      '1672-53460-0363' | 0.1854 |  44.74 |  7.39 |  -0.76 |  2.39 |  0.00 | 40.53 |  0.00 | 41.76 |   0.03 | 41.71 |  0.04 |  2.82 |  0.00 | 43.98 | -0.76 |
|      '1673-53462-0311' | 0.3716 |  45.65 |  7.77 |  -0.23 |  0.73 |  0.01 | 39.54 |  0.01 | 42.57 |   0.01 | 42.78 |  0.01 |  1.13 |  0.01 | 43.32 | -2.33 |
|      '1673-53462-0586' | 0.3037 |  44.50 |  7.15 |  -0.77 | -0.17 |  0.07 | 38.44 |  0.07 | 41.30 |   0.05 | 41.51 |  0.08 |  0.82 |  0.07 | 42.58 | -1.92 |
|      '1675-53466-0638' | 0.0691 |  43.81 |  6.86 |  -1.17 |  0.66 |  0.02 | 37.89 |  0.02 | 41.03 |   0.02 | 40.66 |  0.07 |  0.61 |  0.02 | 42.21 | -1.60 |
|      '3331-54977-0496' | 0.5634 |  45.29 |  7.53 |  -0.35 |  0.20 |  0.03 | 39.43 |  0.03 | 42.36 |   0.02 | 42.60 |  0.02 |  1.40 |  0.03 | 43.24 | -2.05 |
|      '6625-56386-0022' | 0.4391 |  44.59 |  6.67 |  -0.19 |  1.12 |  0.01 | 40.09 |  0.01 | 41.15 |   0.11 | 41.56 |  0.06 |  2.24 |  0.01 | 43.69 | -0.90 |
|      '6666-56371-0624' | 0.6269 |  45.00 |  6.94 |  -0.06 |  0.03 |  0.05 | 39.36 |  0.05 | 41.58 |   0.04 | 42.25 |  0.03 |  1.51 |  0.05 | 43.20 | -1.80 |
|      '6669-56413-0158' | 0.6409 |  44.99 |  7.34 |  -0.47 | -0.41 |  0.11 | 38.95 |  0.11 | 42.40 |   0.02 | 42.36 |  0.03 |  1.01 |  0.11 | 42.92 | -2.07 |
|      '6671-56388-0297' | 0.7057 |  45.42 |  7.75 |  -0.45 | -0.08 |  0.06 | 39.37 |  0.06 | 41.73 |   0.14 | 42.69 |  0.03 |  0.98 |  0.06 | 43.20 | -2.22 |
|      '6671-56388-0376' | 0.5012 |  45.08 |  7.37 |  -0.41 |  1.12 |  0.00 | 40.23 |  0.00 | 42.44 |   0.01 | 42.12 |  0.03 |  2.47 |  0.00 | 43.78 | -1.30 |
|      '6674-56416-0120' | 0.6930 |  45.20 |  7.27 |  -0.19 | -0.25 |  0.08 | 39.19 |  0.08 | 41.88 |   0.02 | 42.64 |  0.02 |  0.93 |  0.08 | 43.08 | -2.12 |
|      '6675-56415-0218' | 0.7588 |  45.47 |  7.55 |  -0.19 | -0.57 |  0.15 | 38.96 |  0.15 | 42.15 |   0.04 | 42.69 |  0.02 |  0.67 |  0.15 | 42.92 | -2.54 |
|      '6676-56389-0284' | 0.7516 |  45.58 |  7.83 |  -0.37 | -0.00 |  0.04 | 39.51 |  0.04 | 42.26 |   0.04 | 42.79 |  0.03 |  1.10 |  0.04 | 43.30 | -2.28 |
|      '6678-56401-0134' | 0.6641 |  44.89 |  7.41 |  -0.64 | -0.13 |  0.07 | 39.26 |  0.07 | 41.74 |   0.06 | 42.19 |  0.04 |  1.38 |  0.07 | 43.13 | -1.76 |
|      '6678-56401-0504' | 0.7461 |  45.40 |  7.78 |  -0.49 | -0.01 |  0.04 | 39.50 |  0.04 | 42.14 |   0.05 | 42.62 |  0.04 |  1.24 |  0.04 | 43.29 | -2.11 |
|      '6678-56401-0978' | 0.7813 |  45.13 |  7.08 |  -0.06 |  0.03 |  0.09 | 39.58 |  0.09 | 41.78 |   0.06 | 42.13 |  0.07 |  1.21 |  0.09 | 43.34 | -1.79 |
|      '6679-56401-0684' | 0.4874 |  45.19 |  7.68 |  -0.60 | -0.09 |  0.05 | 38.99 |  0.05 | 42.08 |   0.03 | 42.60 |  0.01 |  1.11 |  0.05 | 42.94 | -2.24 |
|      '6679-56401-0816' | 0.5060 |  45.11 |  7.56 |  -0.56 |  0.29 |  0.02 | 39.41 |  0.02 | 42.49 |   0.02 | 42.22 |  0.03 |  1.54 |  0.02 | 43.22 | -1.88 |
|      '6685-56412-0211' | 0.5267 |  44.72 |  7.01 |  -0.40 | -0.01 |  0.05 | 39.15 |  0.05 | 41.21 |   0.09 | 41.83 |  0.04 |  1.39 |  0.05 | 43.05 | -1.66 |
|      '6693-56384-0652' | 0.6128 |  45.05 |  6.83 |   0.10 | -0.25 |  0.11 | 39.06 |  0.11 | 41.76 |   0.06 | 42.13 |  0.05 |  1.17 |  0.11 | 42.99 | -2.05 |
|      '6697-56419-0684' | 0.6924 |  45.25 |  7.51 |  -0.38 | -0.29 |  0.10 | 39.14 |  0.10 | 41.79 |   0.07 | 42.44 |  0.04 |  1.04 |  0.10 | 43.05 | -2.20 |
|      '6697-56419-0702' | 0.7279 |  44.91 |  7.03 |  -0.24 | -0.19 |  0.07 | 39.30 |  0.07 | 41.92 |   0.05 | 42.20 |  0.05 |  1.19 |  0.07 | 43.15 | -1.75 |
|      '6698-56637-0527' | 0.6754 |  44.77 |  7.42 |  -0.77 | -0.01 |  0.05 | 39.40 |  0.05 | 42.16 |   0.22 | 42.30 |  0.04 |  1.33 |  0.05 | 43.22 | -1.55 |
|      '6698-56637-0659' | 0.4522 |  44.82 |  7.36 |  -0.66 | -0.09 |  0.06 | 38.92 |  0.06 | 41.50 |   0.09 | 41.84 |  0.04 |  1.06 |  0.06 | 42.90 | -1.92 |
|      '6699-56411-0098' | 0.7580 |  45.54 |  7.71 |  -0.29 | -0.13 |  0.09 | 39.40 |  0.09 | 41.70 |   0.07 | 42.45 |  0.03 |  1.13 |  0.09 | 43.22 | -2.32 |
|      '6699-56411-0302' | 0.6633 |  45.35 |  7.21 |   0.03 |  0.14 |  0.03 | 39.53 |  0.03 | 42.90 |   0.01 | 42.46 |  0.02 |  1.47 |  0.03 | 43.31 | -2.04 |
|      '6699-56411-0646' | 0.4950 |  44.96 |  7.15 |  -0.31 |  0.93 |  0.01 | 40.02 |  0.01 | 41.75 |   0.07 | 42.05 |  0.04 |  2.33 |  0.01 | 43.64 | -1.32 |
|      '6700-56384-0986' | 0.5363 |  44.90 |  7.22 |  -0.44 | -0.33 |  0.08 | 38.85 |  0.08 | 41.56 |   0.12 | 41.97 |  0.07 |  1.14 |  0.08 | 42.85 | -2.05 |
|      '6705-56636-0726' | 0.4123 |  44.91 |  7.37 |  -0.58 |  0.27 |  0.03 | 39.18 |  0.03 | 41.51 |   0.03 | 42.01 |  0.03 |  1.63 |  0.03 | 43.07 | -1.83 |
|      '6710-56416-0754' | 0.4779 |  44.68 |  6.38 |   0.18 | -0.21 |  0.09 | 38.85 |  0.09 | 41.55 |   0.17 | 41.48 |  0.04 |  1.31 |  0.09 | 42.85 | -1.83 |
|      '6727-56369-0022' | 0.6732 |  45.16 |  7.67 |  -0.62 |  0.05 |  0.07 | 39.46 |  0.07 | 41.71 |   0.22 | 42.60 |  0.03 |  1.17 |  0.07 | 43.26 | -1.90 |
|      '6727-56369-0222' | 0.4444 |  45.22 |  7.20 |  -0.10 |  0.23 |  0.04 | 39.21 |  0.04 | 42.15 |   0.02 | 42.30 |  0.02 |  1.32 |  0.04 | 43.10 | -2.12 |
|      '6727-56369-0562' | 0.7879 |  44.95 |  7.32 |  -0.49 | -0.00 |  0.05 | 39.56 |  0.05 | 42.15 |   0.22 | 42.54 |  0.04 |  1.30 |  0.05 | 43.33 | -1.62 |
|      '6734-56386-0562' | 0.4446 |  44.76 |  7.36 |  -0.72 |  0.09 |  0.08 | 39.08 |  0.08 | 41.37 |   0.05 | 41.87 |  0.06 |  1.41 |  0.08 | 43.01 | -1.75 |
|      '6738-56424-0656' | 0.6938 |  45.38 |  7.64 |  -0.38 | -0.18 |  0.07 | 39.26 |  0.07 | 41.74 |   0.05 | 42.53 |  0.02 |  1.05 |  0.07 | 43.13 | -2.25 |
|      '6743-56385-0186' | 0.6019 |  44.75 |  7.35 |  -0.71 | -0.19 |  0.06 | 39.11 |  0.06 | 41.70 |   0.25 | 42.24 |  0.04 |  1.21 |  0.06 | 43.02 | -1.72 |
|      '6745-56425-0274' | 0.4541 |  44.85 |  7.12 |  -0.38 | -0.29 |  0.08 | 38.72 |  0.08 | 41.46 |   0.03 | 41.85 |  0.03 |  1.01 |  0.08 | 42.77 | -2.08 |
|      '6745-56425-0342' | 0.4499 |  45.09 |  7.20 |  -0.23 | -0.27 |  0.07 | 38.73 |  0.07 | 41.42 |   0.06 | 42.03 |  0.02 |  0.89 |  0.07 | 42.77 | -2.32 |
|      '6746-56386-0881' | 0.3708 |  44.87 |  7.45 |  -0.70 |  0.51 |  0.02 | 39.31 |  0.02 | 42.70 |   0.00 | 42.21 |  0.02 |  1.57 |  0.02 | 43.16 | -1.70 |
|      '6746-56386-0918' | 0.3371 |  44.70 |  6.96 |  -0.38 |  0.45 |  0.02 | 39.17 |  0.02 | 40.90 |   0.06 | 41.29 |  0.03 |  1.87 |  0.02 | 43.06 | -1.63 |
|      '6748-56371-0332' | 0.3178 |  44.53 |  7.25 |  -0.84 | -0.17 |  0.09 | 38.48 |  0.09 | 41.68 |   0.03 | 41.62 |  0.05 |  0.97 |  0.09 | 42.61 | -1.92 |
|      '6748-56371-0628' | 0.2311 |  44.35 |  6.63 |  -0.39 | -0.36 |  0.10 | 37.99 |  0.10 | 41.05 |   0.07 | 41.65 |  0.03 |  0.66 |  0.10 | 42.27 | -2.07 |
|      '6748-56371-0744' | 0.2081 |  44.57 |  7.01 |  -0.56 |  0.09 |  0.03 | 38.34 |  0.03 | 41.60 |   0.02 | 41.92 |  0.01 |  1.04 |  0.03 | 42.51 | -2.05 |
|      '6748-56371-0908' | 0.4264 |  45.20 |  6.90 |   0.18 |  0.19 |  0.02 | 39.14 |  0.02 | 41.52 |   0.07 | 42.11 |  0.02 |  1.30 |  0.02 | 43.04 | -2.15 |
|      '6748-56371-0992' | 0.6792 |  45.06 |  7.50 |  -0.55 |  0.48 |  0.02 | 39.89 |  0.02 | 41.70 |   0.07 | 42.42 |  0.03 |  1.76 |  0.02 | 43.55 | -1.51 |
|      '6749-56370-0601' | 0.5216 |  44.51 |  7.24 |  -0.85 | -0.34 |  0.10 | 38.81 |  0.10 | 41.57 |   0.14 | 41.53 |  0.15 |  1.10 |  0.10 | 42.83 | -1.68 |
|      '6750-56367-0596' | 0.3825 |  44.81 |  7.11 |  -0.42 |  0.45 |  0.01 | 39.29 |  0.01 | 40.98 |   0.07 | 41.27 |  0.13 |  1.68 |  0.01 | 43.15 | -1.66 |
|      '6751-56368-0722' | 0.5912 |  44.91 |  7.43 |  -0.64 | -0.35 |  0.10 | 38.92 |  0.10 | 41.57 |   0.08 | 42.03 |  0.09 |  1.15 |  0.10 | 42.90 | -2.01 |
|      '6754-56414-0250' | 0.6784 |  45.27 |  6.87 |   0.29 | -0.30 |  0.08 | 39.11 |  0.08 | 41.89 |   0.04 | 42.22 |  0.03 |  1.20 |  0.08 | 43.03 | -2.24 |
|      '6754-56414-0947' | 0.4844 |  44.76 |  6.77 |  -0.13 |  0.00 |  0.05 | 39.08 |  0.05 | 41.43 |   0.07 | 41.72 |  0.04 |  1.35 |  0.05 | 43.00 | -1.75 |
|      '6756-56426-0680' | 0.7924 |  45.10 |  7.35 |  -0.37 | -0.44 |  0.11 | 39.13 |  0.11 | 42.07 |   0.08 | 42.52 |  0.03 |  1.01 |  0.11 | 43.04 | -2.05 |
|      '6757-56416-0003' | 0.7026 |  45.06 |  7.59 |  -0.65 | -0.37 |  0.12 | 39.08 |  0.12 | 41.68 |   0.08 | 42.44 |  0.07 |  0.81 |  0.12 | 43.01 | -2.05 |
|      '6757-56416-0580' | 0.7091 |  45.87 |  7.93 |  -0.17 |  0.28 |  0.03 | 39.74 |  0.03 | 42.40 |   0.08 | 43.28 |  0.01 |  0.91 |  0.03 | 43.45 | -2.42 |
|      '6760-56425-0748' | 0.7278 |  45.44 |  7.52 |  -0.19 |  0.29 |  0.03 | 39.77 |  0.03 | 41.78 |   0.05 | 42.39 |  0.03 |  1.62 |  0.03 | 43.47 | -1.97 |
|      '6797-56426-0476' | 0.5283 |  44.79 |  6.15 |   0.52 | -0.40 |  0.13 | 38.77 |  0.13 | 41.19 |   0.06 | 41.30 |  0.07 |  1.08 |  0.13 | 42.80 | -1.99 |
|      '6801-56487-0402' | 0.6435 |  44.36 |  7.03 |  -0.78 |  0.17 |  0.03 | 39.52 |  0.03 | 41.53 |   0.30 | 41.79 |  0.09 |  1.75 |  0.03 | 43.30 | -1.05 |
|      '6830-56429-0060' | 0.7497 |  44.87 |  7.13 |  -0.37 | -0.02 |  0.06 | 39.50 |  0.06 | 41.94 |   0.05 | 42.38 |  0.03 |  1.37 |  0.06 | 43.29 | -1.58 |
|      '6831-56426-0110' | 0.5637 |  45.09 |  7.51 |  -0.53 |  0.05 |  0.05 | 39.28 |  0.05 | 41.75 |   0.05 | 42.33 |  0.03 |  1.44 |  0.05 | 43.14 | -1.95 |
|      '6833-56413-0178' | 0.7341 |  45.23 |  7.48 |  -0.37 | -0.18 |  0.08 | 39.32 |  0.08 | 42.89 |   0.01 | 42.51 |  0.04 |  1.30 |  0.08 | 43.16 | -2.06 |
|      '6833-56413-0195' | 0.2188 |  44.19 |  7.10 |  -1.03 |  0.03 |  0.05 | 38.33 |  0.05 | 41.45 |   0.02 | 41.03 |  0.10 |  1.24 |  0.05 | 42.50 | -1.68 |
|      '6838-56429-0297' | 0.4532 |  45.08 |  7.00 |  -0.04 |  0.91 |  0.01 | 39.92 |  0.01 | 41.30 |   0.07 | 41.85 |  0.02 |  2.09 |  0.01 | 43.57 | -1.51 |
|      '6838-56429-0420' | 0.4590 |  44.78 |  7.04 |  -0.37 | -0.08 |  0.08 | 38.94 |  0.08 | 41.17 |   0.18 | 41.69 |  0.04 |  1.30 |  0.08 | 42.91 | -1.86 |
|      '6839-56425-0514' | 0.5062 |  44.86 |  6.71 |   0.04 |  0.19 |  0.03 | 39.30 |  0.03 | 41.95 |   0.03 | 41.78 |  0.04 |  1.71 |  0.03 | 43.16 | -1.70 |
|      '6839-56425-0842' | 0.2900 |  44.48 |  7.11 |  -0.75 |  1.15 |  0.01 | 39.72 |  0.01 | 41.42 |   0.03 | 41.10 |  0.04 |  2.26 |  0.01 | 43.44 | -1.04 |
|      '7032-56471-0211' | 0.5078 |  44.94 |  7.05 |  -0.23 |  0.30 |  0.04 | 39.42 |  0.04 | 41.75 |   0.01 | 41.90 |  0.03 |  1.55 |  0.04 | 43.23 | -1.70 |
|      '7401-56808-0778' | 0.6057 |  44.91 |  6.37 |   0.42 |  0.03 |  0.05 | 39.33 |  0.05 | 41.70 |   0.07 | 41.71 |  0.06 |  1.57 |  0.05 | 43.17 | -1.73 |
|      '7408-56780-0513' | 0.5060 |  45.17 |  6.72 |   0.33 | -0.24 |  0.16 | 38.87 |  0.16 | 41.79 |   0.17 | 42.22 |  0.02 |  0.86 |  0.16 | 42.87 | -2.30 |
|      '7428-56781-0753' | 0.7977 |  45.25 |  7.56 |  -0.43 |  0.05 |  0.04 | 39.62 |  0.04 | 41.94 |   0.07 | 42.42 |  0.06 |  1.57 |  0.04 | 43.37 | -1.88 |
